# Supplementary material for: Combinatorial Control of Light Induced Chromatin Remodeling and Gene Activation in Neurospora
Source: PubMed Central journal article supplement (PMC4378982; doi:10.1371/journal.pgen.1005105), 2015-03-30

# Supplemental Figure 2

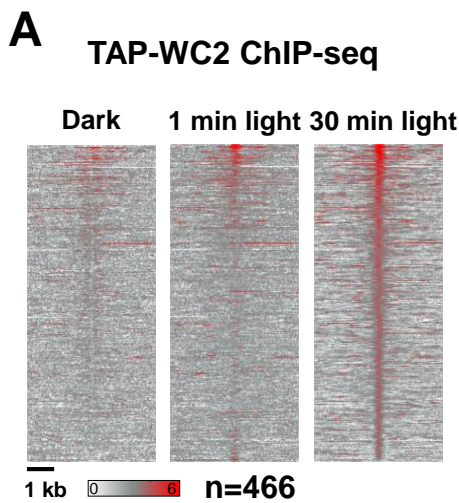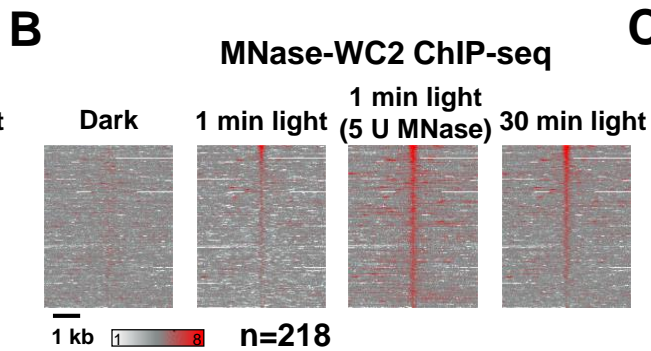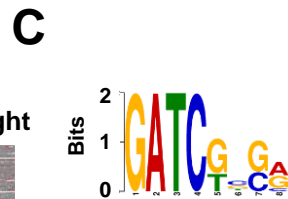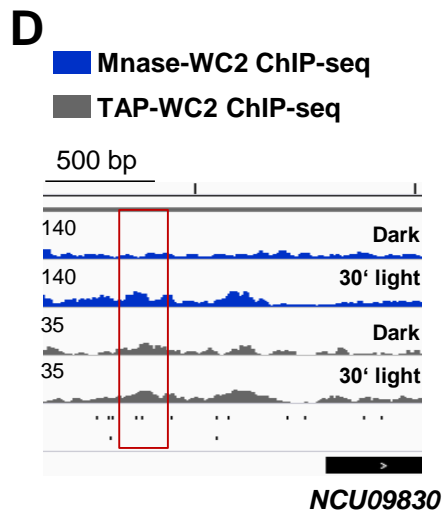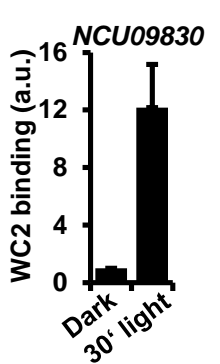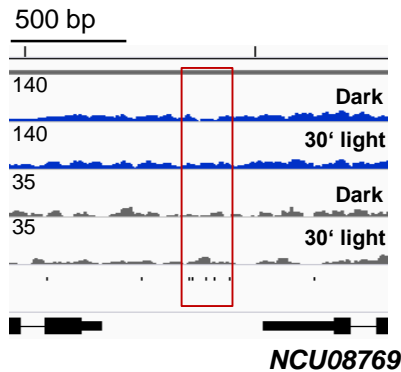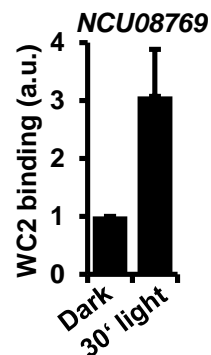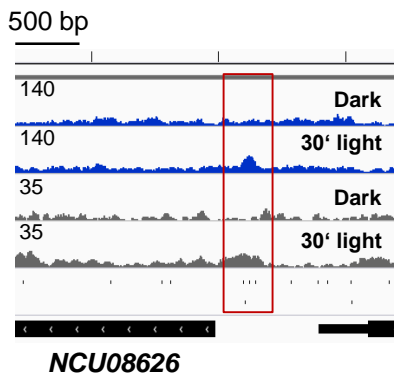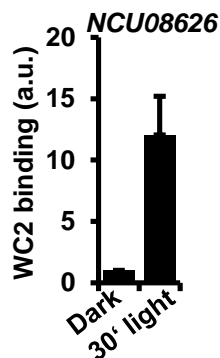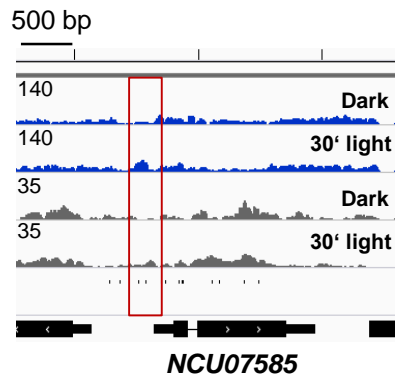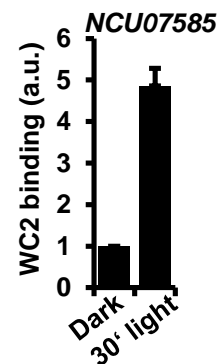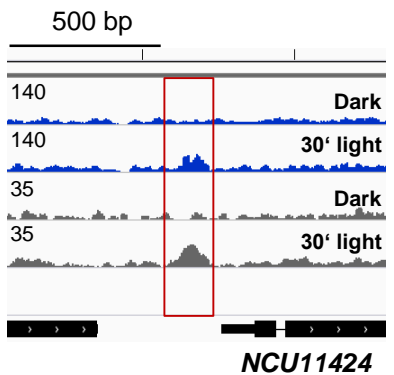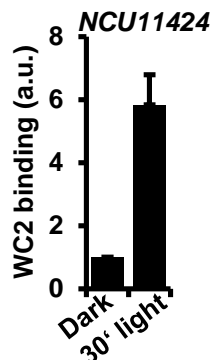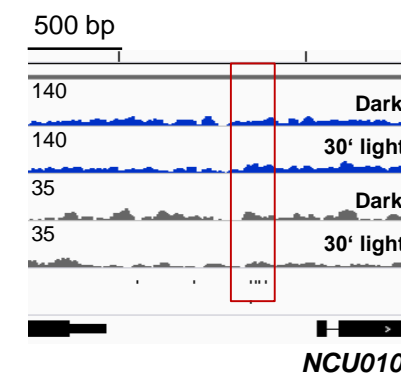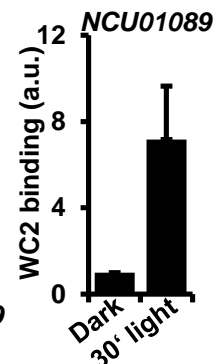

**E**

Light responsive SUB1 binding sites

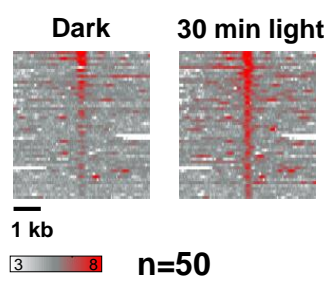

**F**

SUB1 ChIP-seq signal at WCC binding sites

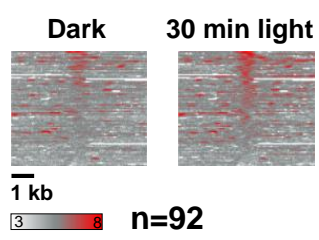

**G**

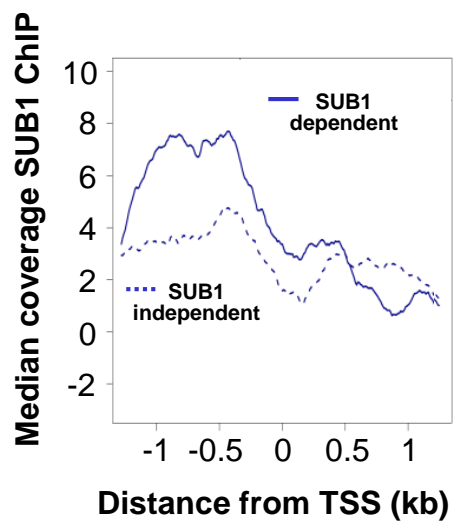

**I**

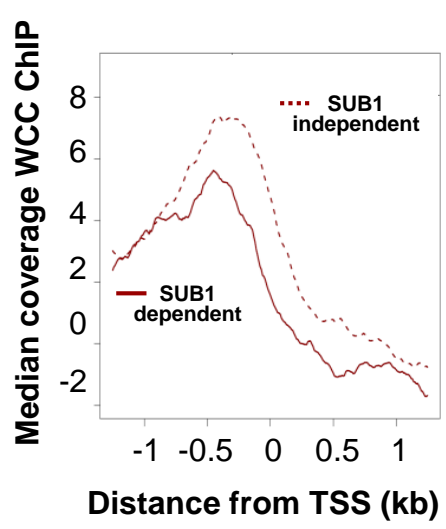

Supplement: pgen.1005105.s002.pdf [file pgen.1005105.s002.pdf]
