# Supplementary material for: Combinatorial Control of Light Induced Chromatin Remodeling and Gene Activation in Neurospora
Source: PubMed Central journal article supplement (PMC4378982; doi:10.1371/journal.pgen.1005105), 2015-03-30

**A**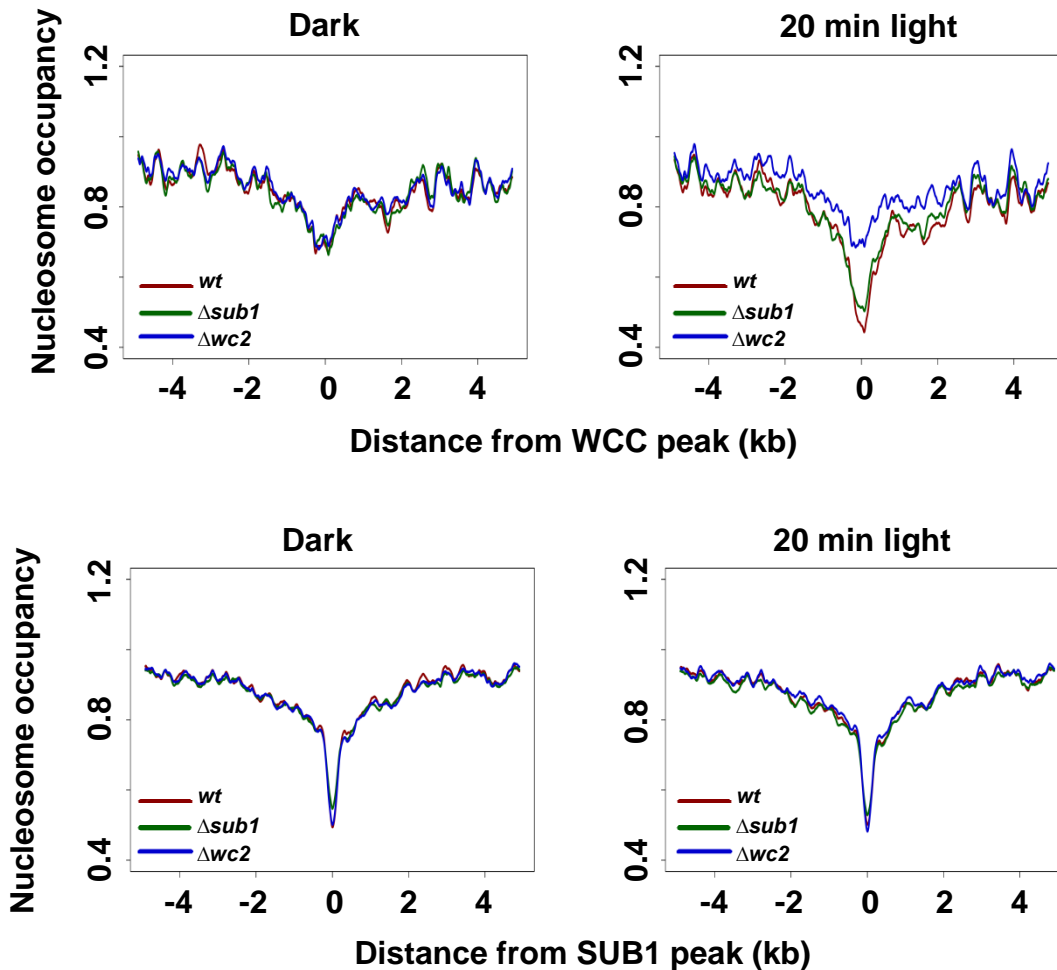**B**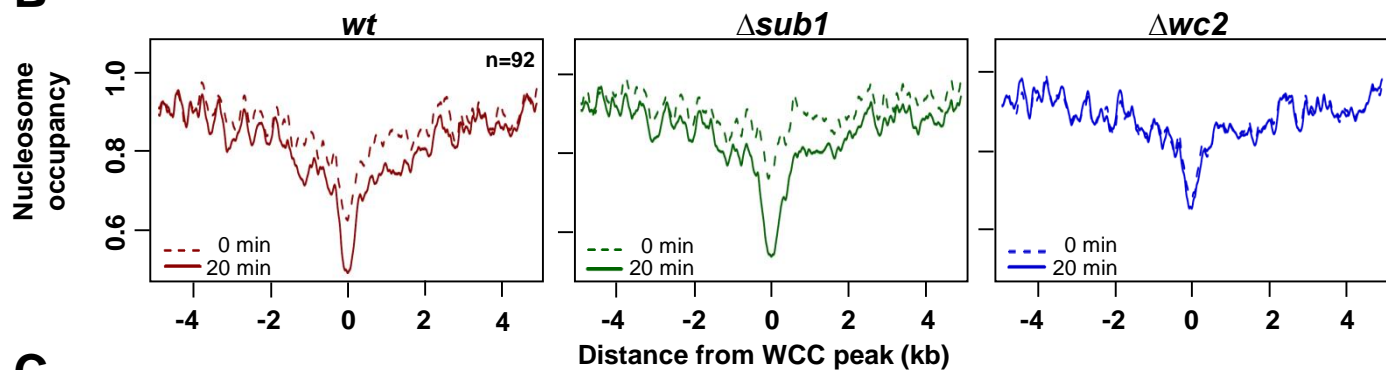**C**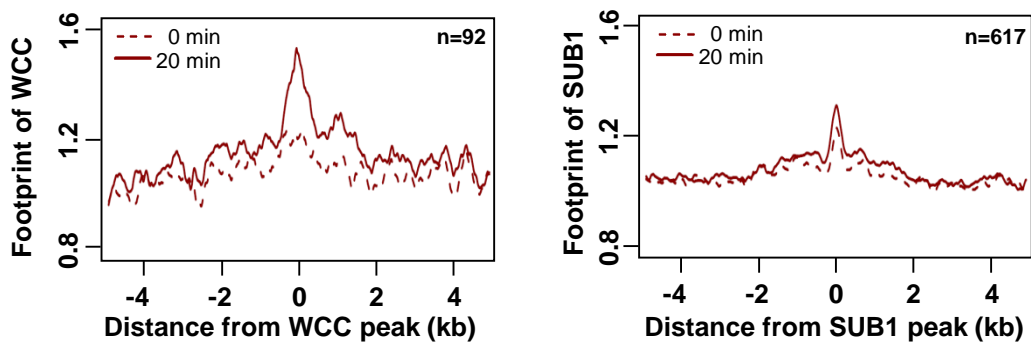

Supplement: pgen.1005105.s003.pdf [file pgen.1005105.s003.pdf]
