# Supplementary material for: Combinatorial Control of Light Induced Chromatin Remodeling and Gene Activation in Neurospora
Source: PubMed Central journal article supplement (PMC4378982; doi:10.1371/journal.pgen.1005105), 2015-03-30

Supplemental Figure 5

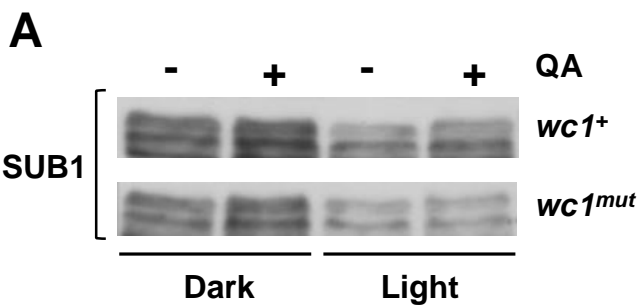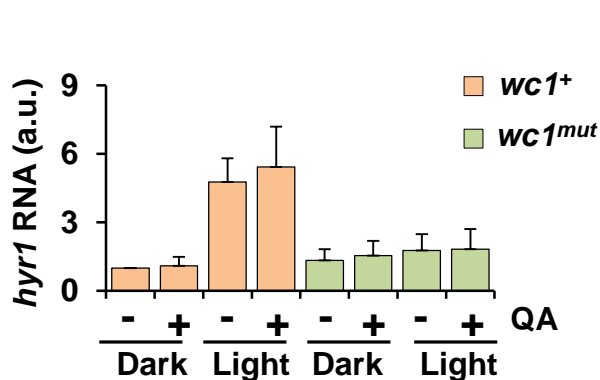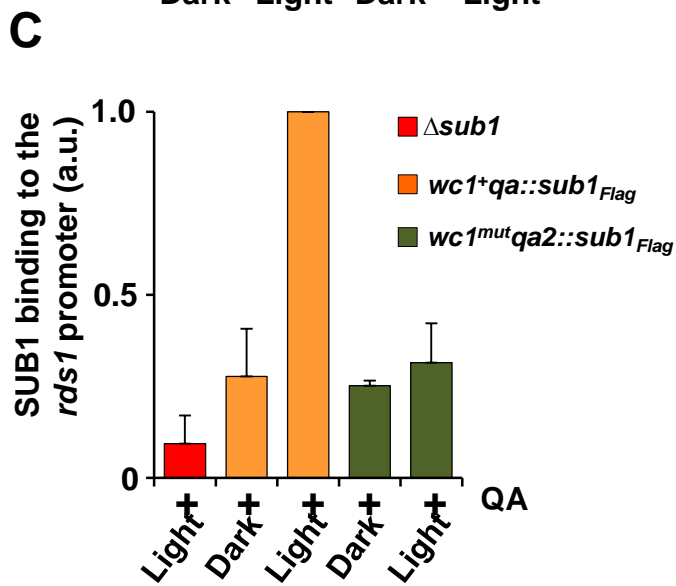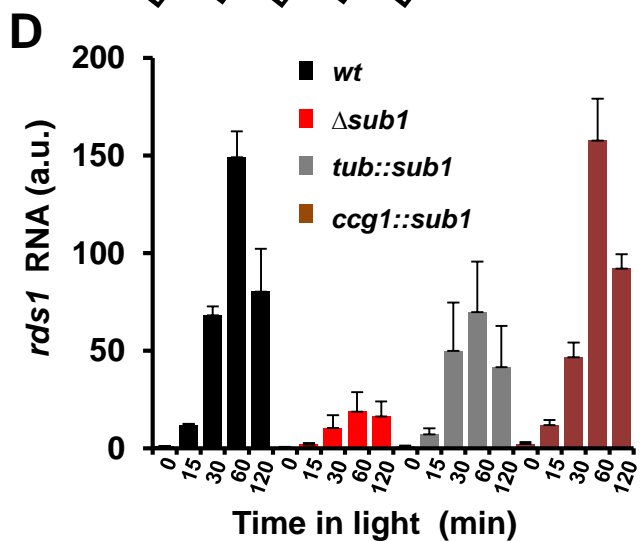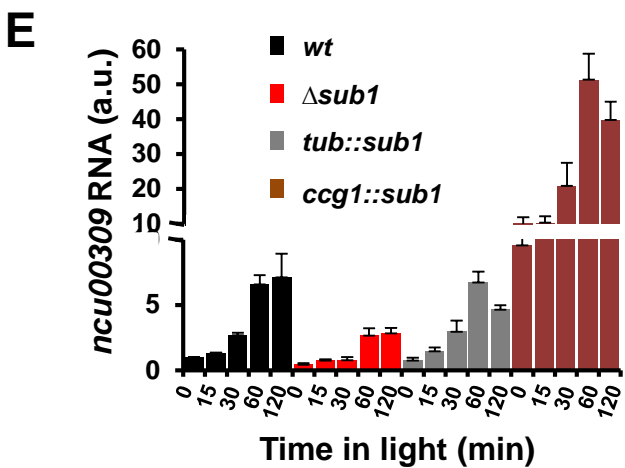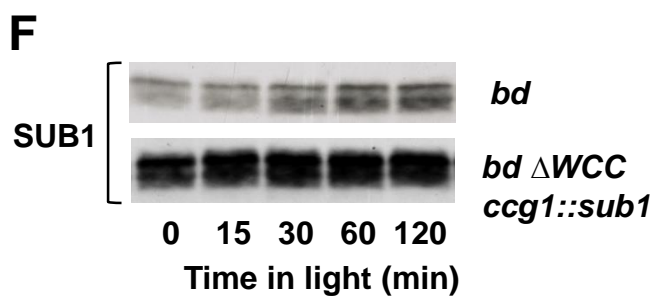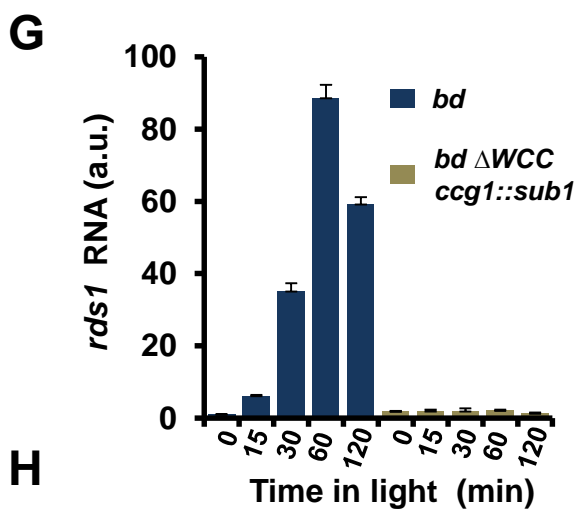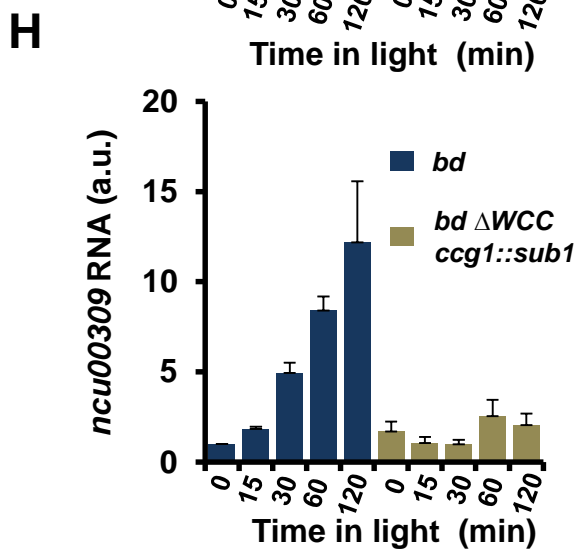

Supplemental Figure 5

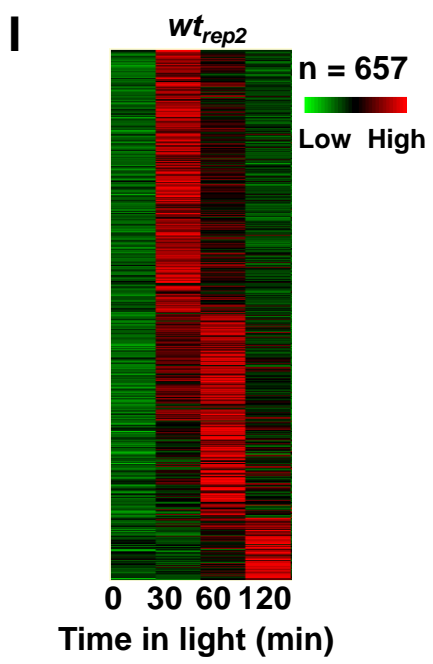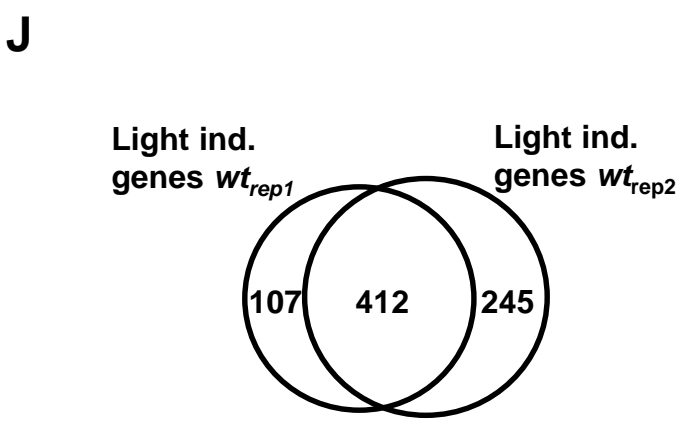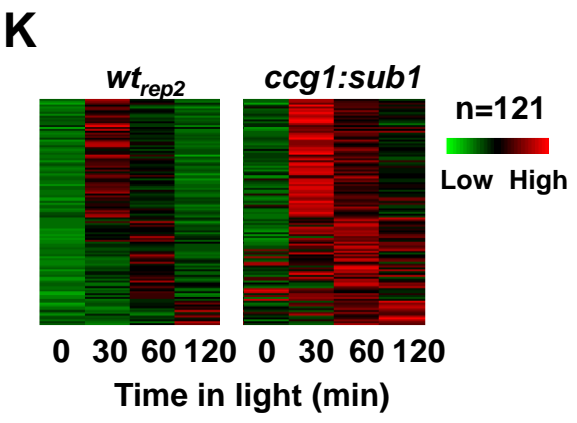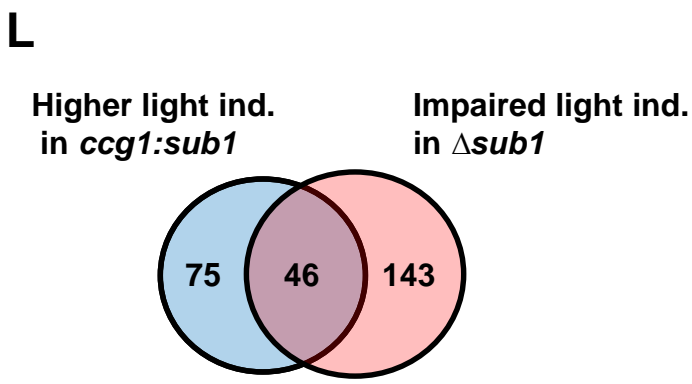

Supplement: pgen.1005105.s005.pdf [file pgen.1005105.s005.pdf]
